# Supplementary material for: Modeling the potential distribution of different types of Dendrocalamus sinicus, the strongest woody bamboo in the world, with MaxEnt model
Source: PeerJ journal article supplement (doi:10.7717/peerj.13847), 2022-08-02

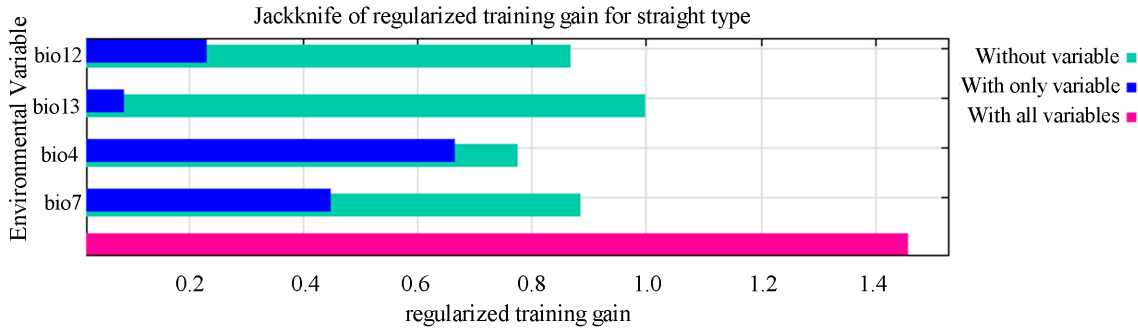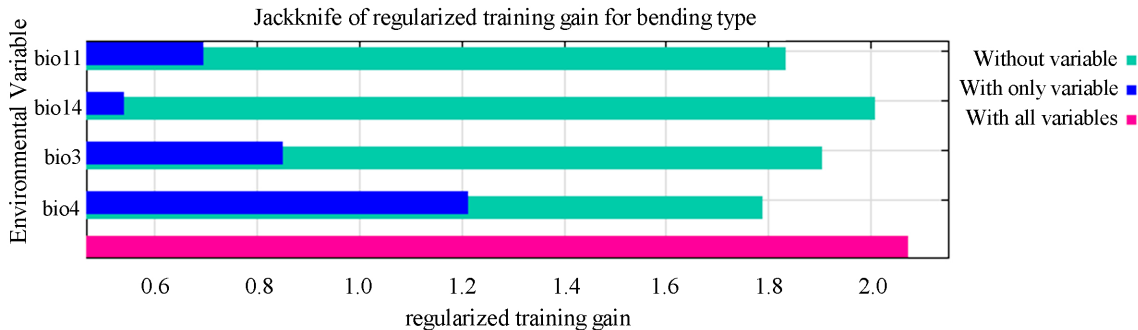

Supplement: Figure_S2.pdf [file Figure_S2.pdf]
