# Supplementary material for: Modeling the potential distribution of different types of Dendrocalamus sinicus, the strongest woody bamboo in the world, with MaxEnt model
Source: PeerJ. 2022 Aug 2;10:e13847. doi: 10.7717/peerj.13847 (PMC9354798; doi:10.7717/peerj.13847)
Supplement: Supplemental Information 7 [file peerj-10-13847-s007.xlsx]

## Sheet: Sheet1
The results of correlation analysis were based on elevation, climatic factors, and solar radiation extracted from coordinate points of the straight type. elev: altitude, bio1-bio7 and bio10-bio17: 15 climatic factors, sard: solar radiation in 12 months
Correlation
	bio7	bio6	bio5	bio4	bio3	bio2	bio17	bio16	bio15	bio14	bio13	bio12	bio11	bio10	bio1	srad9	srad8	srad7	srad6	srad5	srad4	srad3	srad2	srad12	srad11	srad10	srad1	elev
bio7	1
bio6	-0.197	1
bio5	0.538*	0.720**	1
bio4	0.741**	0.143	0.647**	1
bio3	-0.763**	-0.155	-0.673**	-0.921**	1
bio2	0.939**	-0.359	0.355	0.506*	-0.494*	1
bio17	-0.576*	0.650**	0.152	-0.181	0.214	-0.674**	1
bio16	0.053	0.246	0.249	0.47	-0.35	-0.124	0.593*	1
bio15	0.797**	-0.318	0.29	0.831**	-0.760**	0.672**	-0.503*	0.365	1
bio14	-0.432	0.319	-0.031	-0.258	0.307	-0.433	0.867**	0.574*	-0.443	1
bio13	0.115	-0.003	0.079	0.482*	-0.374	-0.047	0.393	0.946**	0.519*	0.399	1
bio12	-0.647**	0.387	-0.125	-0.372	0.406	-0.665**	0.934**	0.574*	-0.538*	0.918**	0.417	1
bio11	0.198	0.920**	0.932**	0.44	-0.451	0.015	0.415	0.266	0.006	0.142	0.045	0.123	1
bio10	0.426	0.765**	0.959**	0.727**	-0.699**	0.192	0.261	0.4	0.325	0.017	0.235	-0.038	0.936**	1
bio1	0.378	0.820**	0.973**	0.638**	-0.632**	0.162	0.296	0.34	0.225	0.049	0.154	-0.003	0.972**	0.991**	1
srad9	-0.183	0.584*	0.373	-0.338	0.302	-0.101	0.523*	0.005	-0.536*	0.524*	-0.205	0.463	0.501*	0.247	0.346	1
srad8	-0.165	0.562*	0.366	-0.329	0.319	-0.068	0.496*	0.017	-0.506*	0.517*	-0.198	0.451	0.488*	0.241	0.338	0.993**	1
srad7	-0.342	0.557*	0.237	-0.518*	0.447	-0.236	0.535*	-0.12	-0.702**	0.544*	-0.335	0.503*	0.414	0.11	0.225	0.961**	0.954**	1
srad6	-0.205	0.448	0.24	-0.500*	0.428	-0.059	0.302	-0.299	-0.614**	0.326	-0.474	0.271	0.357	0.07	0.185	0.936**	0.936**	0.952**	1
srad5	0.863**	-0.224	0.418	0.459	-0.494*	0.897**	-0.660**	-0.198	0.627**	-0.494*	-0.11	-0.703**	0.124	0.257	0.244	0.051	0.077	-0.088	0.11	1
srad4	0.771**	-0.634**	0	0.368	-0.419	0.824**	-0.927**	-0.359	0.690**	-0.741**	-0.145	-0.875**	-0.322	-0.118	-0.166	-0.445	-0.425	-0.517*	-0.304	0.830**	1
srad3	0.670**	-0.708**	-0.135	0.236	-0.291	0.757**	-0.961**	-0.468	0.589*	-0.759**	-0.247	-0.877**	-0.438	-0.258	-0.3	-0.481	-0.462	-0.521*	-0.3	0.747**	0.981**	1
srad2	0.685**	-0.612**	-0.041	0.145	-0.228	0.808**	-0.908**	-0.512*	0.492*	-0.680**	-0.327	-0.822**	-0.335	-0.218	-0.232	-0.249	-0.227	-0.289	-0.062	0.838**	0.957**	0.962**	1
srad12	0.663**	-0.546*	0	0.246	-0.318	0.733**	-0.942**	-0.485*	0.584*	-0.847**	-0.277	-0.901**	-0.278	-0.133	-0.161	-0.376	-0.355	-0.432	-0.185	0.795**	0.957**	0.953**	0.948**	1
srad11	0.669**	-0.439	0.096	0.242	-0.318	0.740**	-0.878**	-0.468	0.553*	-0.795**	-0.29	-0.867**	-0.173	-0.055	-0.071	-0.209	-0.19	-0.295	-0.034	0.853**	0.914**	0.900**	0.924**	0.974**	1
srad10	0.048	0.429	0.403	-0.277	0.168	0.142	0.223	-0.181	-0.368	0.253	-0.323	0.168	0.435	0.213	0.313	0.925**	0.916**	0.875**	0.938**	0.34	-0.121	-0.158	0.087	-0.028	0.141	1
srad1	0.610**	-0.604*	-0.088	0.141	-0.236	0.707**	-0.935**	-0.522*	0.519*	-0.804**	-0.304	-0.861**	-0.359	-0.236	-0.256	-0.352	-0.334	-0.388	-0.147	0.769**	0.949**	0.960**	0.965**	0.990**	0.963**	0.001	1
elev	-0.404	-0.792**	-0.968**	-0.583*	0.608**	-0.207	-0.342	-0.342	-0.166	-0.182	-0.134	-0.067	-0.951**	-0.951**	-0.971**	-0.443	-0.433	-0.337	-0.284	-0.271	0.176	0.307	0.207	0.201	0.106	-0.416	0.278	1
**: At 0.01 level (two-tailed), the correlation was significant.
*: At level 0.05 (two-tailed), the correlation was significant.
